# Supplementary material
Source: publisher site journal article supplement (https://www.dovepress.com/article/227621)
Supplement: Supplementary file 1 [file get_supplementary_file.php]

**Ethnic differences in the prevalence of type 2 diabetes diagnoses in the UK: cross-sectional analysis of The Health Improvement Network primary care database**

# **SUPPLEMENTARY MATERIALS**

Missing values in ethnicity were primarily handled by calibrated-δ adjustment multiple imputation.1 This method augments the standard multiple imputation approach (usually performed under the missing at random assumption) with population-level information about the distribution of ethnicity. Thus, the post-imputation distribution of ethnicity is calibrated to that in the population. The 2011 UK census distribution of ethnicity for London was used as the reference distribution for calibration.

To construct an imputation model for ethnicity, we examined the associations between sex, age group, deprivation status and several disease indicators with the recorded ethnicity data, as well as the missingness in ethnicity (Section S1).2 Analyses of the complete records, single imputation with the White ethnic group, and standard multiple imputation were also conducted for comparison (Section S2). Further details on how multiple imputation of missing data in ethnicity was performed are presented in Section S1.

## **Section S1. Supplementary information for the Methods section**

For imputation of missing data in ethnicity, we used a multinomial logistic regression imputation model with all the variables in the analysis model, including age group, sex, quintiles of the Townsend score, and the indicator of prevalent type 2 diabetes cases (the outcome variable). In addition, we included in the imputation model indicators of diseases known to be associated with ethnicity, including heart attack, stroke, chronic kidney disease, sickle cell disease, thalassaemia, and schizophrenia. These auxiliary variables were used to inform the imputation of ethnicity since the recording of ethnicity in primary care might differ between those with and without each disease. To support the inclusion of the demographic and disease variables as covariates in the imputation model for ethnicity, we used a multivariable logistic regression model to assess the associations between these variables and ethnicity among those with observed ethnicity. In addition, we fitted a multivariable multinomial logistic regression model to explore the associations between these variables and missingness in ethnicity. Calibrated-δ adjustment multiple imputation was performed assuming that missingness in ethnicity was dependent on these demographic and disease indicator variables, as well as ethnic groups (ie, a missing not at random mechanism).

Missing values in ethnicity were imputed 30 times, creating m=30 imputations, and Rubin's rules 3,4 were used to pool the results. Analyses were conducted using Stata 15.1,5 where the community-contributed command uvis mlogit6 was used for calibrated-δ adjustment multiple imputation, mi impute mlogit for standard multiple imputation, and mi estimate: logit for performing the main analysis in the imputed datasets and pooling the results using Rubin's rules.3,4 More detailed information about the implementation of calibrated-δ adjustment multiple imputation can be found in Pham et al.1

## **Section S2. Supplementary information for the Results section**

There were some ethnic variations by sex, age group, deprivation status, and indicators of diseases (Table S1); apart from sickle cell disease and thalassaemia, these variables were also predictive of missingness in ethnicity (Table S2). These results supported the use of such variables to inform the imputation of ethnicity.

**Table S1**. Adjusted association between covariates used to inform the imputation of ethnicity and ethnicity, n=309,684.

|  | **Asian** | | **Black** | | **Mixed/Other** | |
| --- | --- | --- | --- | --- | --- | --- |
| **Variable** | **RRRa** | **95% CI** | **RRRa** | **95% CI** | **RRRa** | **95% CI** |
| **Sex** |  |  |  |  |  |  |
| Male | 1 |  | 1 |  | 1 |  |
| Female | 0.92 | 0.9 to 0.94 | 1.12 | 1.09 to 1.15 | 1.06 | 1.02 to 1.09 |
| **Age group (years)** |  |  |  |  |  |  |
| 0-9 | 1.50 | 1.44 to 1.57 | 1.35 | 1.29 to 1.41 | 1.98 | 1.88 to 2.09 |
| 10-19 | 1.48 | 1.41 to 1.55 | 1.54 | 1.47 to 1.61 | 1.90 | 1.80 to 2.01 |
| 20-29 | 1.37 | 1.31 to 1.43 | 0.82 | 0.78 to 0.86 | 1.23 | 1.16 to 1.30 |
| 30-39 | 1.43 | 1.38 to 1.49 | 0.72 | 0.69 to 0.75 | 1.09 | 1.04 to 1.15 |
| 40-49 | 1 |  | 1 |  | 1 |  |
| 50-59 | 0.80 | 0.76 to 0.83 | 0.83 | 0.80 to 0.87 | 0.81 | 0.76 to 0.86 |
| 60-69 | 0.58 | 0.55 to 0.61 | 0.34 | 0.32 to 0.36 | 0.49 | 0.45 to 0.52 |
| 70-79 | 0.51 | 0.48 to 0.54 | 0.41 | 0.38 to 0.44 | 0.38 | 0.34 to 0.41 |
| 80+ | 0.26 | 0.23 to 0.28 | 0.17 | 0.15 to 0.19 | 0.17 | 0.15 to 0.20 |
| **Townsend deprivation score** |  |  |  |  |  |  |
| Quintile 1 (least deprived) | 1 |  | 1 |  | 1 |  |
| Quintile 2 | 1.25 | 1.19 to 1.32 | 1.30 | 1.21 to 1.41 | 1.25 | 1.16 to 1.35 |
| Quintile 3 | 2.30 | 2.19 to 2.41 | 2.82 | 2.64 to 3.01 | 2.13 | 1.99 to 2.27 |
| Quintile 4 | 2.48 | 2.37 to 2.60 | 4.82 | 4.52 to 5.14 | 2.71 | 2.54 to 2.89 |
| Quintile 5 (Most deprived) | 2.45 | 2.33 to 2.57 | 8.67 | 8.14 to 9.24 | 4.09 | 3.84 to 4.36 |
| **Disease indicator** |  |  |  |  |  |  |
| Type 2 diabetes | 3.50 | 3.35 to 3.67 | 2.18 | 2.07 to 2.31 | 1.62 | 1.50 to 1.76 |
| Heart attack | 1.23 | 1.10 to 1.36 | 0.50 | 0.42 to 0.59 | 0.92 | 0.76 to 1.11 |
| Stroke | 0.85 | 0.76 to 0.94 | 0.93 | 0.83 to 1.04 | 0.78 | 0.65 to 0.92 |
| Chronic kidney disease | 1.08 | 1.01 to 1.15 | 1.36 | 1.27 to 1.45 | 1.02 | 0.92 to 1.13 |
| Sickle cell disease | 2.25 | 0.70 to 7.21 | 141.64 | 74.15 to 270.55 | 15.16 | 6.76 to 34.00 |
| Thalassaemia | 6.81 | 6.07 to 7.64 | 3.60 | 3.10 to 4.17 | 4.75 | 4.06 to 5.56 |
| Schizophrenia | 0.83 | 0.70 to 0.99 | 1.77 | 1.55 to 2.01 | 0.94 | 0.75 to 1.17 |
| aRRR: relative risk ratios for each variable were adjusted for all other variables in the multivariable multinomial logistic regression model, with the White ethnic group set as the reference category for ethnicity. | | | | | | |

**Table S2**. Adjusted association between covariates used to inform the imputation of ethnicity and missingness in ethnicity, n=404,318.

| **Variable** | **ORa** | **95% CI** | **p-value** |
| --- | --- | --- | --- |
| **Sex** |  |  | <0.001 |
| Male | 1 |  |  |
| Female | 1.26 | 1.24 to 1.28 |  |
| **Age group (years)** |  |  | <0.001 |
| 0-9 | 1.27 | 1.23 to 1.31 |  |
| 10-19 | 0.55 | 0.54 to 0.57 |  |
| 20-29 | 0.90 | 0.87 to 0.92 |  |
| 30-39 | 1.35 | 1.31 to 1.38 |  |
| 40-49 | 1 |  |  |
| 50-59 | 0.84 | 0.82 to 0.86 |  |
| 60-69 | 0.93 | 0.90 to 0.96 |  |
| 70-79 | 1.05 | 1.01 to 1.09 |  |
| 80+ | 0.97 | 0.93 to 1.02 |  |
| **Townsend deprivation score** |  |  | <0.001 |
| Quintile 1 (least deprived) | 1 |  |  |
| Quintile 2 | 0.96 | 0.94 to 0.99 |  |
| Quintile 3 | 0.90 | 0.88 to 0.93 |  |
| Quintile 4 | 1.07 | 1.04 to 1.10 |  |
| Quintile 5 (most deprived) | 0.94 | 0.91 to 0.96 |  |
| **Disease indicator** |  |  |  |
| Type 2 diabetes | 1.35 | 1.30 to 1.40 | <0.001 |
| Heart attack | 1.24 | 1.15 to 1.34 | <0.001 |
| Stroke | 1.12 | 1.06 to 1.19 | <0.001 |
| Chronic kidney disease | 1.15 | 1.11 to 1.20 | <0.001 |
| Sickle cell disease | 1.01 | 0.78 to 1.32 | 0.925 |
| Thalassaemia | 1.00 | 0.91 to 1.11 | 0.976 |
| Schizophrenia | 1.29 | 1.15 to 1.44 | <0.001 |
| aOR: Odds ratios for each variable were adjusted for all other variables in the multivariable logistic regression model for having a record of type 2 diabetes. | | | |

The population-level distribution of ethnicity was correctly recovered by calibrated-δ adjustment multiple imputation (Figure S1). The method produced lower estimates for the Asian and Black groups (OR Asian versus White 2.36, 95% CI 2.26 to 2.47; OR Black versus White 1.65, 95% CI 1.56 to 1.73, Table S3), compared with complete record analysis, single imputation with the White ethnic group, and standard multiple imputation. For all minority ethnic groups, the 95% confidence intervals for point estimates in calibrated-δ adjustment multiple imputation did not cross that of the other methods. With m=30 imputations, Monte Carlo errors for point estimates were <10% of the estimated standard errors for all parameters. The relative efficiency of performing 30 imputations compared with an infinite number of imputations was >0.98 for all parameter estimates and multiple imputation methods.

**Figure S1**. Distribution of ethnicity under different methods for handling missing values. n=309,684 for complete record analysis, n=404,318 for other methods; MI, multiple imputation; MI of ethnicity was conditional on age, sex, social deprivation, and disease indicators including type 2 diabetes (the outcome variable); 95% confidence intervals were narrow and not plotted.

**Table S3**. Association between ethnicity and the prevalence of type 2 diabetes diagnoses, adjusted for sex, age group, and deprivation status, under different methods for handling missing ethnicity data.

| **Variable** | **Complete record analysis (n=309,684)** | | **Single imputation with White ethnic group (n=404,318)** | | | **Standard multiple imputation (n=404,318, m=30 imputations)** | | | **Calibrated-δ adjustment multiple imputation (n=404,318, m=30 imputations)** | | |
| --- | --- | --- | --- | --- | --- | --- | --- | --- | --- | --- | --- |
|  | **ORa** | **95% CI** | **ORa** | **95% CI** | **ORa** | | **95% CI** | **ORa** | | **95% CI** |
| **Ethnic group** |  |  |  |  |  | |  |  | |  |
| White | 1 |  | 1 |  | 1 | |  | 1 | |  |
| Asian | 3.59 | 3.43 to 3.75 | 3.63 | 3.47 to 3.79 | 3.58 | | 3.43 to 3.73 | 2.36 | | 2.26 to 2.47 |
| Black | 2.25 | 2.13 to 2.38 | 2.26 | 2.14 to 2.38 | 2.25 | | 2.14 to 2.38 | 1.65 | | 1.56 to 1.73 |
| Mixed/Other | 1.61 | 1.49 to 1.74 | 1.62 | 1.50 to 1.75 | 1.61 | | 1.49 to 1.75 | 1.17 | | 1.08 to 1.27 |
| **Sex** |  |  |  |  |  | |  |  | |  |
| Men | 1 |  | 1 |  | 1 | |  | 1 | |  |
| Women | 0.73 | 0.70 to 0.75 | 0.75 | 0.73 to 0.77 | 0.76 | | 0.74 to 0.78 | 0.77 | | 0.75 to 0.8 |
| **Age group (years)** |  |  |  |  |  | |  |  | |  |
| 0-9 | 0.01 | 0.01 to 0.02 | 0.01 | 0.01 to 0.02 | 0.01 | | 0.01 to 0.02 | 0.01 | | 0.01 to 0.02 |
| 10-19 | 0.02 | 0.02 to 0.03 | 0.03 | 0.02 to 0.04 | 0.02 | | 0.02 to 0.03 | 0.03 | | 0.02 to 0.03 |
| 20-29 | 0.12 | 0.10 to 0.14 | 0.12 | 0.11 to 0.14 | 0.12 | | 0.11 to 0.14 | 0.12 | | 0.11 to 0.14 |
| 30-39 | 0.31 | 0.28 to 0.34 | 0.32 | 0.29 to 0.34 | 0.32 | | 0.3 to 0.35 | 0.33 | | 0.31 to 0.36 |
| 40-49 | 1 |  | 1 |  | 1 | |  | 1 | |  |
| 50-59 | 2.64 | 2.49 to 2.80 | 2.60 | 2.47 to 2.74 | 2.60 | | 2.47 to 2.74 | 2.52 | | 2.39 to 2.65 |
| 60-69 | 5.26 | 4.97 to 5.56 | 5.19 | 4.93 to 5.46 | 5.31 | | 5.04 to 5.59 | 4.93 | | 4.69 to 5.19 |
| 70-79 | 7.66 | 7.23 to 8.12 | 7.75 | 7.35 to 8.17 | 7.98 | | 7.57 to 8.42 | 7.49 | | 7.11 to 7.89 |
| 80+ | 8.15 | 7.66 to 8.69 | 8.00 | 7.56 to 8.47 | 8.38 | | 7.91 to 8.88 | 7.62 | | 7.19 to 8.06 |
| **Townsend deprivation score** |  |  |  |  |  | |  |  | |  |
| Quintile 1 (least deprived) | 1 |  | 1 |  | 1 | |  | 1 | |  |
| Quintile 2 | 1.12 | 1.06 to 1.20 | 1.12 | 1.06 to 1.19 | 1.11 | | 1.05 to 1.18 | 1.12 | | 1.06 to 1.18 |
| Quintile 3 | 1.22 | 1.15 to 1.29 | 1.24 | 1.18 to 1.31 | 1.21 | | 1.15 to 1.27 | 1.25 | | 1.19 to 1.31 |
| Quintile 4 | 1.38 | 1.30 to 1.46 | 1.42 | 1.35 to 1.50 | 1.38 | | 1.31 to 1.46 | 1.47 | | 1.40 to 1.55 |
| Quintile 5 (most deprived) | 1.69 | 1.60 to 1.80 | 1.78 | 1.69 to 1.88 | 1.71 | | 1.62 to 1.80 | 1.86 | | 1.77 to 1.96 |
| aOR: odds ratios for each variable were adjusted for all other variables in the multivariable logistic regression model for type 2 diabetes.  Note: Adapted from Pham TM, Carpenter JR, Morris TP, Wood AM, Petersen I. Population-calibrated multiple imputation for a binary/categorical covariate in categorical regression models. Stat Med. 2019;38(5):792-808. doi:10.1002/sim.8004. Creative Commons license and disclaimer available from: <http://creativecommons.org/licenses/by/4.0/legalcode>.1 | | | | | | | | | | | |

# **REFERENCES**

1. Pham, T. M., Carpenter, J. R., Morris, T. P., Wood, A. M. & Petersen, I. Population-calibrated multiple imputation for a binary/categorical covariate in categorical regression models. *Stat. Med.* **38**, 792–808 (2019).

2. Carpenter, J. R. & Kenward, M. G. *Multiple imputation and its application*. (John Wiley & Sons, Ltd., 2013).

3. Rubin, D. B. Inference and missing data. *Biometrika* **63**, 581–592 (1976).

4. Barnard, J. & Rubin, D. B. Small-sample degrees of freedom with multiple imputation. *Biometrika* **86**, 948–955 (1999).

5. StataCorp. Stata statistical software: release 15. (2017).

6. Royston, P. Multiple imputation of missing values. *Stata J.* **4**, 227–241 (2004).
